# Supplementary material for: High-resolution structural genomics reveals new therapeutic vulnerabilities in glioblastoma
Source: HighWire-hosted journal article supplement (doi:10.1101/gr.246520.118), 2019-06-27
Supplement: Supplemental_Table_S1.docx [file Supplemental_Table_S1.docx]

| Culture | Sex | Age | Diagnosis |
| --- | --- | --- | --- |
| G523 | male | 56 | Grade IV GBM (primary) |
| G567 | female | 79 | Grade IV GBM (primary) |
| G583 | male | 51 | Grade IV GBM (primary) |

**Table S1. Patient Metadata.**
