# Supplementary material for: High-resolution structural genomics reveals new therapeutic vulnerabilities in glioblastoma
Source: HighWire-hosted journal article supplement (doi:10.1101/gr.246520.118), 2019-06-27
Supplement: Supplemental_Table_S2.docx [file Supplemental_Table_S2.docx]

| Sample | G523 | | G567 | | G583 | |
| --- | --- | --- | --- | --- | --- | --- |
| Sequenced Read Pairs | 987872088 |  | 648384391 |  | 946816196 |  |
| Normal Paired | 606725882 | 61.42% | 431203021 | 66.50% | 583173876 | 61.59% |
| Chimeric Paired | 316547673 | 32.04% | 181016338 | 27.92% | 293311744 | 30.98% |
| Chimeric Ambiguous | 61448520 | 6.22% | 33580971 | 5.18% | 67132554 | 7.09% |
| Unmapped | 3150013 | 0.32% | 2584061 | 0.40% | 3198022 | 0.34% |
| Ligation Motif Present | 610262561 | 61.78% | 344384929 | 53.11% | 580961417 | 61.36% |
| Alignable (Normal + Chimeric Paired) | 923273555 | 93.46% | 612219359 | 94.42% | 876485620 | 92.57% |
| Unique Reads | 899024184 | 91.01% | 591382003 | 91.21% | 853813774 | 90.18% |
| PCR Duplicates | 24017563 | 2.43% | 20600390 | 3.18% | 22360566 | 2.36% |
| Optical Duplicates | 231808 | 0.02% | 236966 | 0.04% | 311280 | 0.03% |
| Library Complexity Estimate | 17428112758 |  | 8885019000 |  | 16872649385 |  |
| Intra-fragment Reads | 4263356 | 0.43% | 18588381 | 2.87% | 4663017 | 0.49% |
| Below Map Quality Threshold | 168882646 | 17.10% | 108824038 | 16.78% | 166670088 | 17.60% |
| Hi-C Contacts | 725878182 | 73.48% | 463969584 | 71.56% | 682480669 | 72.08% |
| Ligation Motif Present | 315563763 | 31.94% | 180194809 | 27.79% | 294614774 | 31.12% |
| 3' Bias (Long Range) |  | 75% - 25% |  | 75% - 25% |  | 75% - 25% |
| Pair Type % (Left-Inner-Outer-Right) |  | 25% - 25% - 25% - 25% |  | 25% - 25% - 25% - 25% |  | 25% - 25% - 25% - 25% |
| Inter-chromosomal | 165691822 | 16.77% | 107590636 | 16.59% | 166261440 | 17.56% |
| Intra-chromosomal | 560186360 | 56.71% | 356378948 | 54.96% | 516219229 | 54.52% |
| Short Range (<20 kb) | 144049793 | 14.58% | 91616578 | 14.13% | 130074819 | 13.74% |
| Long Range (>20 kb) | 416136335 | 42.12% | 264761938 | 40.83% | 386144123 | 40.78% |
|  |  |  |  |  |  |  |
| Map Resolution (bp) | 3350 |  | 4950 |  | 3750 |  |

**Table S2. Juicer Hi-C Quality Metrics.**
Percentages presented refer to total sequenced read pairs. For a detailed explanation of these metrics, refer to Rao 2014, Supplemental II.d. Hi-C Library Statistics and Quality Control. Basepairs (bp); Kilobases (kb).
