# Supplementary material for: High-resolution structural genomics reveals new therapeutic vulnerabilities in glioblastoma
Source: HighWire-hosted journal article supplement (doi:10.1101/gr.246520.118), 2019-06-27
Supplement: Supplemental_Table_S3.docx [file Supplemental_Table_S3.docx]

| Sample | G523 | G567 | G583 |
| --- | --- | --- | --- |
| Loop count | 5829 | 4896 | 6269 |
| Lengths (bp) |  |  |  |
| Minimum | 40000 | 40000 | 40000 |
| 25th percentile | 210000 | 225000 | 225000 |
| Mean | 1002990 | 611476 | 1686941 |
| Median | 400000 | 380000 | 390000 |
| 75th percentile | 700000 | 650000 | 680000 |
| Maximum | 218550000 | 58225000 | 113850000 |
| Loops >= 1 Mb | 825 | 539 | 853 |
| Loops >= 1 Mb % | 14 | 11 | 14 |
| Loops >= 1 CTCF motif | 4585 | 3565 | 4829 |
| Loops >= 1 CTCF motif % | 79 | 73 | 77 |
| Loops with 2 CTCF motifs | 1759 | 1047 | 1759 |
| Loops with 2 CTCF motifs % | 30 | 21 | 28 |

**Table S3. Loop Summary.** Basepairs (bp); Megabases (Mb).
