# Supplementary material for: High-resolution structural genomics reveals new therapeutic vulnerabilities in glioblastoma
Source: HighWire-hosted journal article supplement (doi:10.1101/gr.246520.118), 2019-06-27
Supplement: Supplemental_Table_S4.docx [file Supplemental_Table_S4.docx]

| Sample | G523 | | | | |
| --- | --- | --- | --- | --- | --- |
| Resolution (kb) | 5 | 10 | 25 | 50 | 100 |
| Domain Count | 2742 | 4929 | 4059 | 2445 | 1108 |
| Lengths (bp) |  | | | | |
| Minimum | 60000 | 120000 | 300000 | 600000 | 1200000 |
| 25th percentile | 125000 | 200000 | 425000 | 800000 | 1600000 |
| Mean | 364531 | 391365 | 863101 | 1563190 | 2891697 |
| Median | 310000 | 290000 | 625000 | 1100000 | 2100000 |
| 75th percentile | 475000 | 480000 | 1025000 | 1850000 | 3300000 |
| Maximum | 2450000 | 3650000 | 5450000 | 10800000 | 31000000 |

| Sample | G567 | | | | |
| --- | --- | --- | --- | --- | --- |
| Resolution (kb) | 5 | 10 | 25 | 50 | 100 |
| Domain Count | 1973 | 4299 | 4078 | 2372 | 1061 |
| Lengths (bp) |  | | | | |
| Minimum | 60000 | 120000 | 300000 | 600000 | 1200000 |
| 25th percentile | 130000 | 200000 | 450000 | 800000 | 1600000 |
| Mean | 408462 | 399970 | 820739 | 1502466 | 2960320 |
| Median | 355000 | 280000 | 600000 | 1100000 | 2200000 |
| 75th percentile | 530000 | 430000 | 1000000 | 1800000 | 3400000 |
| Maximum | 2190000 | 3700000 | 4625000 | 10150000 | 37000000 |

| Sample | G583 | | | | |
| --- | --- | --- | --- | --- | --- |
| Resolution (kb) | 5 | 10 | 25 | 50 | 100 |
| Domain Count | 3341 | 5871 | 4689 | 2489 | 1131 |
| Lengths (bp) |  | | | | |
| Minimum | 60000 | 120000 | 300000 | 600000 | 1200000 |
| 25th percentile | 120000 | 200000 | 425000 | 850000 | 1600000 |
| Mean | 334701 | 364628 | 833962 | 1519225 | 2861715 |
| Median | 200000 | 280000 | 600000 | 1100000 | 2200000 |
| 75th percentile | 435000 | 450000 | 1000000 | 1850000 | 3300000 |
| Maximum | 3040000 | 3730000 | 6375000 | 10050000 | 44800000 |

**Table S4. Domain Summary.** Basepairs (bp); Kilobases (kb).
