# Supplementary material for: High-resolution structural genomics reveals new therapeutic vulnerabilities in glioblastoma
Source: HighWire-hosted journal article supplement (doi:10.1101/gr.246520.118), 2019-06-27
Supplement: Supplemental_Table_S5.docx [file Supplemental_Table_S5.docx]

| Sample | G523 | G567 | G583 |
| --- | --- | --- | --- |
| Total Compartments | 3581 | 4256 | 3932 |
| Lengths (bp) |  | | |
| Minimum | 50000 | 50000 | 50000 |
| 25th percentile | 100000 | 50000 | 50000 |
| Mean | 736540 | 611043 | 652887 |
| Median | 200000 | 150000 | 150000 |
| 75th percentile | 750000 | 550000 | 650000 |
| Maximum | 15000000 | 16500000 | 12050000 |

**Table S5. Compartment Calls.**
