# Supplementary material for: High-resolution structural genomics reveals new therapeutic vulnerabilities in glioblastoma
Source: HighWire-hosted journal article supplement (doi:10.1101/gr.246520.118), 2019-06-27
Supplement: Supplemental_Table_S6.docx [file Supplemental_Table_S6.docx]

| Sample | G523 | G567 | G583 |
| --- | --- | --- | --- |
| FastQC Total Sequences (millions) | 108.0 | 29.3 | 112.5 |
| STAR uniquely mapped reads (millions) | 100.5 | 27.0 | 103.4 |
| STAR uniquely mapped reads (%) | 93.1 | 92.0 | 91.9 |

**Table S6. Bulk RNA-seq summary statistics.**
