# Supplementary material for: High-resolution structural genomics reveals new therapeutic vulnerabilities in glioblastoma
Source: HighWire-hosted journal article supplement (doi:10.1101/gr.246520.118), 2019-06-27
Supplement: Supplemental_Table_S7.docx [file Supplemental_Table_S7.docx]

| Gene Name | Max Loop Count | Role | Reference |
| --- | --- | --- | --- |
| *VSNL1* | 23 | Neuronal calcium sensor. Highly expressed in cerebellar granule cells. | Bernstein et al. 1999;  Braunewell et al. 2001 |
| *ALKBH5* | 22 | m6A demethylase. Promotes GBM tumorigenesis by stabilizing the *FOXM1* transcripts. Poor prognostic factor for GBM patients. | Zhang et al. 2017 |
| *IGFBP2* | 18 | Regulation of insulin-like growth factor signaling and the stemness properties of GSCs | Hsieh et al. 2010 |
| *ANK2* | 10 | Positively regulated by SOX2 which imparts important self-renewal and tumor-initiating properties to GSCs | Berezovsky et al. 2014;  Gangemi et al. 2009 |
| *SOX2-OT* | 7 | Large gene overlapping the *SOX2* self-renewal gene |  |

**Table S7. Extensively looped genes associated with GSC maintenance.**
